# Supplementary material for: The formation mechanism of chloropicrin from methylamine during chlorination: a DFT study
Source: Royal Society of Chemistry journal article supplement (doi:10.1039/c8em00581h), 2019-01-01
Supplement: c8em00581h1.pdf [file c8em00581h1.pdf]

## Supporting Information

# The formation mechanism of chloropicrin from methylamine during chlorination: a DFT study

*Chunxiu Han, Huiyuan Zhao, Meng Dong, Yong Dong Liu\**,

*Rugang Zhong*

Beijing Key Laboratory of Environmental and Viral Oncology,  
College of Life Science & Bioengineering, Beijing University of Technology,

Beijing 100124, China

\*Corresponding author. phone: +86-10-6739-1667; fax: +86-10-6739-2001.

E-mail: [ydliu@bjut.edu.cn](mailto:ydliu@bjut.edu.cn).

56 Pages

1 Scheme

3 Tables

2 Figures

44 Cartesian orientations of transition states

---

\*Corresponding author. Fax: +86-10-6739-2001. E-mail: [ydliu@bjut.edu.cn](mailto:ydliu@bjut.edu.cn).

## Contents

| <b>Item</b>                                  | <b>Page</b> |
|----------------------------------------------|-------------|
| Scheme S1                                    | 5           |
| Table S1                                     | 6           |
| Table S2                                     | 7           |
| Table S3                                     | 8           |
| Figure S1                                    | 10          |
| Figure S2                                    | 11          |
| Standard orientation of <b>TS-0W/B3LYP</b>   | 12          |
| Standard orientation of <b>TS-0W/M06-2X</b>  | 13          |
| Standard orientation of <b>TS-1W/B3LYP</b>   | 14          |
| Standard orientation of <b>TS-1W/M06-2X</b>  | 15          |
| Standard orientation of <b>TS-2W/B3LYP</b>   | 16          |
| Standard orientation of <b>TS-2W/M06-2X</b>  | 17          |
| Standard orientation of <b>TS-3W/B3LYP</b>   | 18          |
| Standard orientation of <b>TS-3W/M06-2X</b>  | 19          |
| Standard orientation of <b>TS-0W'/B3LYP</b>  | 20          |
| Standard orientation of <b>TS-0W'/M06-2X</b> | 21          |
| Standard orientation of <b>TS-1W'/B3LYP</b>  | 22          |
| Standard orientation of <b>TS-1W'/M06-2X</b> | 23          |
| Standard orientation of <b>TS-2W'/B3LYP</b>  | 24          |
| Standard orientation of <b>TS-2W'/M06-2X</b> | 25          |

|                                                             |    |
|-------------------------------------------------------------|----|
| Standard orientation of <b>TS-3W'/B3LYP</b>                 | 26 |
| Standard orientation of <b>TS-3W'/M06-2X</b>                | 27 |
| Standard orientation of <b>TS-DCMA/B3LYP</b>                | 28 |
| Standard orientation of <b>TS-DCMA/M06-2X</b>               | 29 |
| Standard orientation of <b>TS-NCNMHA/B3LYP</b>              | 30 |
| Standard orientation of <b>TS-NCNMHA/M06-2X</b>             | 31 |
| Standard orientation of <b>TS-NSM/B3LYP</b>                 | 32 |
| Standard orientation of <b>TS-NSM/M06-2X</b>                | 33 |
| Standard orientation of <b>TS-DCMA-1/B3LYP</b>              | 34 |
| Standard orientation of <b>TS-DCMA-1/M06-2X</b>             | 35 |
| Standard orientation of <b>TS-DCMA-2/B3LYP</b>              | 36 |
| Standard orientation of <b>TS-DCMA-2/M06-2X</b>             | 37 |
| Standard orientation of <b>TS-DCMA-3/B3LYP</b>              | 38 |
| Standard orientation of <b>TS-DCMA-3/M06-2X</b>             | 39 |
| Standard orientation of <b>TS-NCMI/B3LYP</b>                | 40 |
| Standard orientation of <b>TS-NCMI/M06-2X</b>               | 41 |
| Standard orientation of <b>TS-NCNHMI<sup>+</sup>/B3LYP</b>  | 42 |
| Standard orientation of <b>TS-NCNHMI<sup>+</sup>/M06-2X</b> | 43 |
| Standard orientation of <b>TS-NCCMHA/B3LYP</b>              | 44 |
| Standard orientation of <b>TS-NCCMHA/M06-2X</b>             | 45 |
| Standard orientation of <b>TS-CNSM/B3LYP</b>                | 46 |
| Standard orientation of <b>TS-CNSM/M06-2X</b>               | 47 |

|                                                           |    |
|-----------------------------------------------------------|----|
| Standard orientation of <b>TS-NM/B3LYP</b>                | 48 |
| Standard orientation of <b>TS-NM-1/B3LYP</b>              | 49 |
| Standard orientation of <b>TS-NM-1/M06-2X</b>             | 50 |
| Standard orientation of <b>TS-NM-2/B3LYP</b>              | 51 |
| Standard orientation of <b>TS-NM-2/M06-2X</b>             | 52 |
| Standard orientation of <b>TS-CNM<sup>-</sup>/B3LYP</b>   | 53 |
| Standard orientation of <b>TS-CNM<sup>-</sup>/M06-2X</b>  | 54 |
| Standard orientation of <b>TS-DCNM<sup>-</sup>/B3LYP</b>  | 55 |
| Standard orientation of <b>TS-DCNM<sup>-</sup>/M06-2X</b> | 56 |

Scheme S1: TCNM formation pathways from NCNMHA, NCCMHA and NDCMNDHA during chlorination

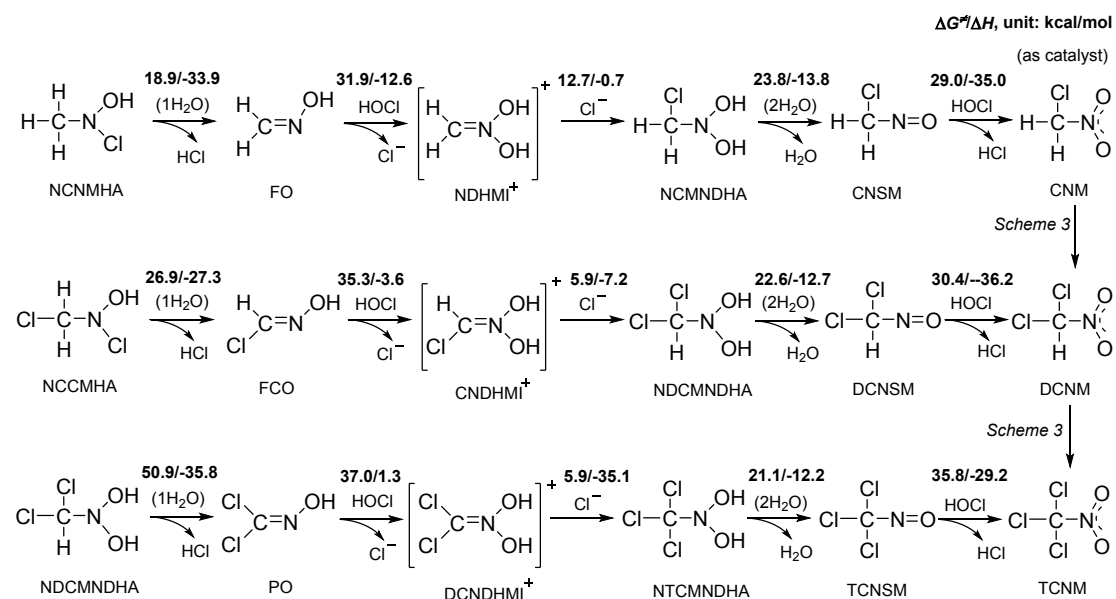

Table S1. Activation free energies and reaction energies (at 298 K and 1 atm, in kcal/mol) calculated at the CCSD(T)/6-311++G(2d,p)//M06-2X/6-311+G(d,p) level for elementary steps of TCNM formation from NCNMHA, NCCMHA and NDCMNDHA during chlorination

| Reactions                                                                                     | Name of transition states  | $\Delta G^\ddagger$ | $\Delta H$ | $\Delta G$ |
|-----------------------------------------------------------------------------------------------|----------------------------|---------------------|------------|------------|
| $\text{NCNMHA} + \text{H}_2\text{O} \rightarrow \text{FO} + \text{HCl} + \text{H}_2\text{O}$  | (TS-NCNMHA)                | 18.9                | -33.9      | -32.5      |
| $\text{FO} + \text{HOCl} \rightarrow \text{NDHMI}^+ + \text{Cl}^-$                            | (TS-FO)                    | 31.9                | -12.6      | -9.8       |
| $\text{NDHMI}^+ + \text{Cl}^- \rightarrow \text{NCMNDHA}$                                     | (TS-NDHMI <sup>+</sup> )   | 12.7                | -0.7       | 0.4        |
| $\text{NCMNDHA} + 2\text{H}_2\text{O} \rightarrow \text{CNSM} + 3\text{H}_2\text{O}$          | (TS-NCMNDHA)               | 23.8                | -13.8      | -17.3      |
| $\text{CNSM} + \text{HOCl} \rightarrow \text{CNM} + \text{HCl}$                               | (TS-CNSM)                  | 29.0                | -35.0      | -35.0      |
| $\text{NCCMHA} + \text{H}_2\text{O} \rightarrow \text{FCO} + \text{HCl} + \text{H}_2\text{O}$ | (TS-NCCMHA)                | 26.9                | -27.3      | -26.2      |
| $\text{FCO} + \text{HOCl} \rightarrow \text{CNDHMI}^+ + \text{Cl}^-$                          | (TS-FCO)                   | 35.3                | -3.6       | -1.5       |
| $\text{CNDHMI}^+ + \text{Cl}^- \rightarrow \text{NDCMNDHA}$                                   | (TS-CNDHMI <sup>+</sup> )  | 5.9                 | -7.2       | -6.0       |
| $\text{NDCMNDHA} + 2\text{H}_2\text{O} \rightarrow \text{DCNSM} + 3\text{H}_2\text{O}$        | (TS-NDCMNDHA)              | 22.6                | -12.7      | -16.7      |
| $\text{DCNSM} \rightarrow \text{DCNM} + \text{HCl}$                                           | (TS-DNSM)                  | 30.4                | -36.2      | -34.4      |
| $\text{NDCMNDHA} + \text{H}_2\text{O} \rightarrow \text{PO} + 2\text{H}_2\text{O}$            | (TS-NDCMNDHA-1)            | 50.9                | -35.8      | -38.8      |
| $\text{PO} + \text{HOCl} \rightarrow \text{DCNDHMI}^+ + \text{Cl}^-$                          | (TS-PO)                    | 37.0                | 1.3        | 5.3        |
| $\text{DCNDHMI}^+ + \text{Cl}^- \rightarrow \text{NTCMNDHA}$                                  | (TS-DCNDHMI <sup>+</sup> ) | 5.9                 | -35.1      | -33.4      |
| $\text{NTCMNDHA} + 2\text{H}_2\text{O} \rightarrow \text{TCNSM} + 3\text{H}_2\text{O}$        | (TS-NTCMNDHA)              | 21.1                | -12.2      | -16.1      |
| $\text{TCNSM} + \text{HOCl} \rightarrow \text{TCNM} + \text{HCl}$                             | (TS-TCNSM)                 | 35.8                | -29.2      | -28.4      |

Table S2. Energies (in hartree) of for *N*-Chlorination of MA and NCMA by hypochlorous acid assisted by n=0~3 water molecules

| n                                     | species | B3LYP/6-311+(d,p)  |             |                    | M06-2X/6-311+(d,p) |            |                    |
|---------------------------------------|---------|--------------------|-------------|--------------------|--------------------|------------|--------------------|
|                                       |         | $\Delta\Delta G^*$ | E**         | $\Delta\Delta H^*$ | $\Delta\Delta G^*$ | E**        | $\Delta\Delta H^*$ |
| MA + HOCl → NCMA + H <sub>2</sub> O   |         |                    |             |                    |                    |            |                    |
| 0                                     | R       | 0.04267            | -630.97926  | 0.087102           | 0.046079           | -630.97890 | 0.08823            |
|                                       | TS      | 0.04610            | -631.85534  | 0.084273           | 0.049196           | -630.90778 | 0.08646            |
|                                       | P       | 0.04611            | -631.96269  | 0.087044           | 0.048485           | -631.02306 | 0.08811            |
| 1                                     | R       | 0.06693            | -707.302325 | 0.11505            | 0.06952            | -707.30232 | 0.11515            |
|                                       | TS      | 0.06977            | -707.267186 | 0.113225           | 0.07040            | -707.26723 | 0.11410            |
|                                       | P       | 0.065              | -707.340991 | 0.114617           | 0.06953            | 707.34099  | 0.11494            |
| 2                                     | R       | 0.09066            | -783.62276  | 0.14272            | 0.0921             | -783.62208 | 0.14411            |
|                                       | TS      | 0.0893             | -783.60948  | 0.137              | 0.09087            | -783.60913 | 0.13834            |
|                                       | P       | 0.08319            | -783.65865  | 0.14206            | 0.08995            | -783.65791 | 0.14392            |
| 3                                     | R       | 0.11108            | -859.94509  | 0.17018            | 0.11331            | -859.94452 | 0.17216            |
|                                       | TS      | 0.10611            | -859.93572  | 0.16302            | 0.11058            | -859.93500 | 0.16541            |
|                                       | P       | 0.10545            | -859.97802  | 0.16950            | 0.10963            | -859.97755 | 0.17145            |
| NCMA + HOCl → DCMA + H <sub>2</sub> O |         |                    |             |                    |                    |            |                    |
| 0                                     | R       | 0.02671            | -1090.02687 | 0.07833            | 0.03520            | -1090.0270 | 0.07950            |
|                                       | TS      | 0.03288            | -1089.95865 | 0.07400            | 0.03659            | -1089.9524 | 0.07692            |
|                                       | P       | 0.03315            | -1090.06778 | 0.07739            | 0.03508            | -1090.0668 | 0.07860            |
| 1                                     | R       | 0.05230            | -1166.34928 | 0.10568            | 0.05128            | -1166.3475 | 0.10714            |
|                                       | TS      | 0.05712            | -1166.29495 | 0.10270            | 0.05875            | -1166.2949 | 0.10481            |
|                                       | P       | 0.05112            | -1166.38513 | 0.10493            | 0.05617            | -1166.3841 | 0.10553            |
| 2                                     | R       | 0.07648            | -1242.66962 | 0.13351            | 0.07953            | -1242.6688 | 0.13423            |
|                                       | TS      | 0.07578            | -1242.64214 | 0.12532            | 0.07753            | -1242.6409 | 0.12583            |
|                                       | P       | 0.06958            | -1242.70282 | 0.13238            | 0.07666            | -1242.7019 | 0.13428            |
| 3                                     | R       | 0.09719            | -1318.9915  | 0.16111            | 0.09855            | -1318.9905 | 0.16311            |
|                                       | TS      | 0.09281            | -1318.9677  | 0.15066            | 0.09712            | -1318.9672 | 0.15286            |
|                                       | P       | 0.09383            | -1319.0230  | 0.16004            | 0.09704            | -1319.0221 | 0.16219            |

\* Thermal correction to Gibbs Free Energy (G)/Enthalpy(H) calculated at the B3LYP/6-311+(d,p) and M06-2X/6-311+(d,p) levels

\*\* single point calculated at the CCSD(T)/6-311++(2d,p) level

Table S3. Energies (in hartree) of calculated at the CCSD(T)/6-311++G(2d,p)//M06-2X /6-311+G(d,p) level for elementary steps of TCNM formation from DCMA during chlorination

| Reactions                                 | species | $\Delta\Delta G^*$ | $E^{**}$      | $\Delta\Delta H^*$ |
|-------------------------------------------|---------|--------------------|---------------|--------------------|
| DCMA + 3H <sub>2</sub> O →                | R       | 0.052993           | -1166.3841336 | 0.106563           |
| NCNMHA + HCl +                            | TS      | 0.057368           | -1166.320135  | 0.104517           |
| 2H <sub>2</sub> O                         | P       | 0.054714           | -1166.3703776 | 0.103042           |
| CMHA + H <sub>2</sub> O →                 | R       | 0.050749           | -706.0822002  | 0.092702           |
| NSM + HCl + H <sub>2</sub> O              | TS      | 0.050019           | -706.0659196  | 0.089351           |
|                                           | P       | 0.043552           | -706.0889814  | 0.088084           |
| NSM + HOCl → NM                           | R       | 0.025154           | -704.8108492  | 0.068062           |
| + HCl                                     | TS      | 0.027269           | -704.7725137  | 0.066837           |
|                                           | P       | 0.025906           | -704.8737997  | 0.067342           |
| DCMA + H <sub>2</sub> O →                 | R       | 0.03424            | -1090.062357  | 0.078147           |
| NCMI + HCl + H <sub>2</sub> O             | TS      | 0.031022           | -1090.003188  | 0.071695           |
|                                           | P       | 0.028584           | -1090.103315  | 0.073352           |
| DCMA + ClO <sup>-</sup> →                 | R       | 0.03424            | -1090.062357  | 0.078147           |
| NCMI + HOCl + Cl <sup>-</sup>             | TS      | 0.031022           | -1090.003188  | 0.071695           |
|                                           | P       | 0.028584           | -1090.103315  | 0.073352           |
| DCMA + OH <sup>-</sup> →                  | R       | 0.010474           | -1548.598946  | 0.057226           |
| NCMI + H <sub>2</sub> O + Cl <sup>-</sup> | TS      | 0.004724           | -1548.571776  | 0.050528           |
|                                           | P       | 0.006396           | -1548.69068   | 0.056916           |
| NCMI + HOCl →                             | R       | 0.012357           | -1090.16415   | 0.053087           |
| NCNMHI <sup>+</sup> + Cl <sup>-</sup>     | TS      | 0.018              | -1090.156636  | 0.055126           |
|                                           | P       | 0.020726           | -1090.184868  | 0.057078           |
| NCNHMI <sup>+</sup> + Cl <sup>-</sup> →   | R       | 0.013438           | -1088.829526  | 0.053087           |
| NCCMHA                                    | TS      | 0.018              | -1088.820369  | 0.055126           |
|                                           | P       | 0.020726           | -1088.847711  | 0.057078           |
| NCCMHA + H <sub>2</sub> O →               | R       | 0.039168           | -1165.16804   | 0.084795           |
| CNSM + HCl + H <sub>2</sub> O             | TS      | 0.036903           | -1165.145925  | 0.08012            |
|                                           | P       | 0.029132           | -1165.172798  | 0.079714           |
| CNSM + HOCl →                             | R       | 0.015224           | -1163.894126  | 0.059304           |
| CNM + HCl                                 | TS      | 0.017685           | -1163.850303  | 0.057988           |
|                                           | P       | 0.015829           | -1163.950531  | 0.059893           |
| NM + HOCl + 2H <sub>2</sub> O             | R       | 0.060988           | -932.5340545  | 0.128687           |
| → CNM + 3H <sub>2</sub> O                 | TS      | 0.070475           | -932.469428   | 0.12377            |
|                                           | P       | 0.061301           | -932.6037444  | 0.128965           |
| NM + HOCl + ClO <sup>-</sup>              | R       | 0.028937           | -1314.759183  | 0.080533           |
| → CNM + OH <sup>-</sup> +                 | TS      | 0.019611           | -1314.73825   | 0.075289           |
| HOCl                                      | P       | 0.024833           | -1314.778186  | 0.081388           |
| NM + HOCl + OH <sup>-</sup>               | R       | 0.034139           | -855.7037828  | 0.087584           |
| → CNM + OH <sup>-</sup> +                 | TS      | 0.030702           | -855.7018684  | 0.084951           |
| H <sub>2</sub> O                          | P       | 0.036901           | -855.766977   | 0.089261           |
| CNM <sup>-</sup> + 2HOCl →                | R       | 0.012942           | -1773.841166  | 0.071632           |
| DCNM + OH <sup>-</sup> +                  | TS      | 0.016791           | -1773.838674  | 0.07096            |



|                             |    |          |              |          |
|-----------------------------|----|----------|--------------|----------|
| HOCl                        | P  | 0.01485  | -1773.856375 | 0.072492 |
| DCNM <sup>-</sup> + 2HOCl → | R  | 0.004561 | -2232.92194  | 0.062668 |
| TCNM + OH <sup>-</sup> +    | TS | 0.005812 | -2232.918799 | 0.062724 |
| HOCl                        | P  | 0.00451  | -2232.928487 | 0.061875 |

\* Thermal correction to Gibbs Free Energy (G)/Enthalpy(H) calculated at the M06-2X/6-311+(d,p) level

\*\* single point calculated at the CCSD(T)/6-311++(2d,p) level

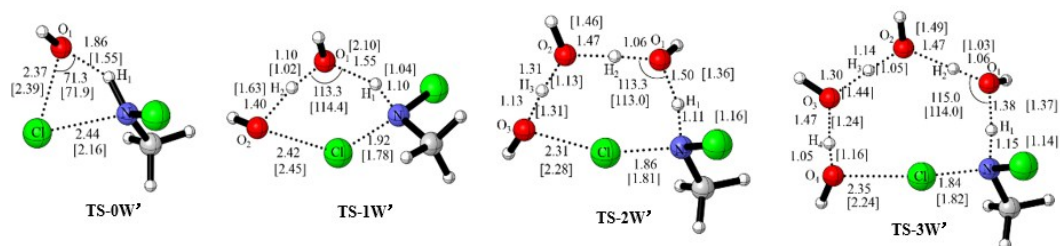

Figure S1. The optimized structures and important geometric parameters calculated at the B3LYP/6-311+G(d,p) and M06-2X/6-311+G(d,p) levels for the transition state in DCMA formation from *N*-chlorination of NCMA by hypochlorous acid assisted by 0~3 water molecules; distances in angstrom, angles in degree; values in the bracket from M06-2X method (atoms in green color represents chlorine atom, atom in blue color represents nitrogen atom; atom in red represents oxygen atom, atom in white represents hydrogen atom; atom in grey color represents carbon atom).

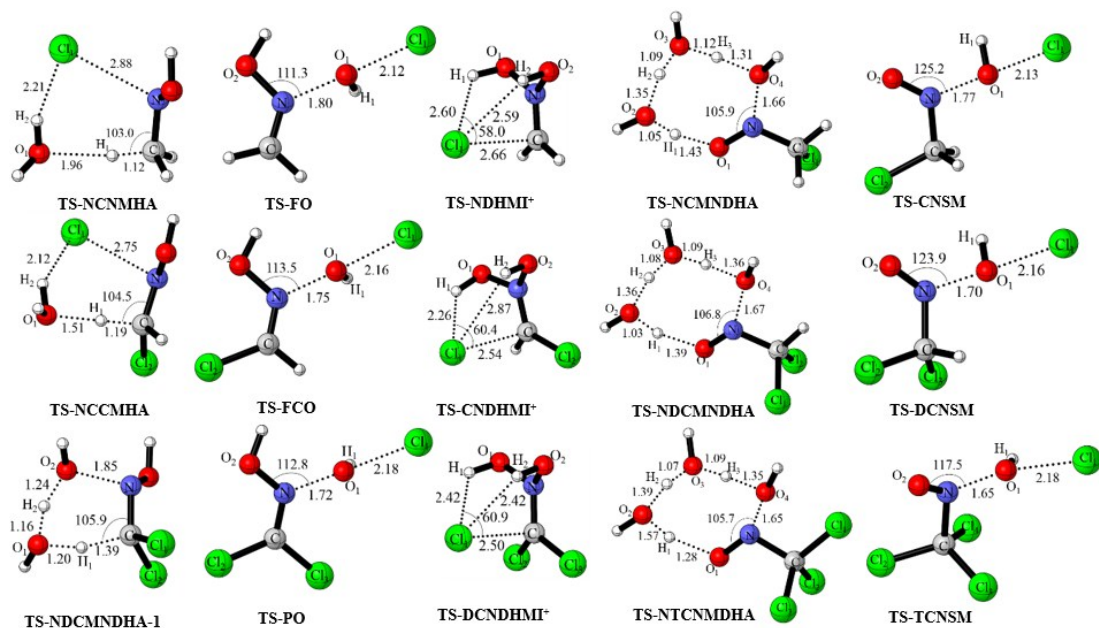

Figure S2. The optimized structures and important geometric parameters calculated at the M06-2X/6-311+G(d,p) level for the transition states in TCNM formation from NCNMHA, NCCMHA and NDCMNDHA during chlorination; distances in angstrom, angles in degree (atoms in green color represents chlorine atom, atom in blue color represents nitrogen atom; atom in red represents oxygen atom, atom in white represents hydrogen atom; atom in grey color represents carbon atom).

## Standard orientation of TS-0W/B3LYP

Cartesian coordinates of all the transition states optimized at the b3lyp/6-311+G\*\* level:

Standard orientation of TS-0W/B3LYP

State=1-A

Charge = 0 Multiplicity = 1

Lowest Harmonic Vibrational Frequency (LHVF) = -368.89 cm<sup>-1</sup>

Standard orientation:

| Center<br>Number | Atomic<br>Number | Atomic<br>Type | Coordinates (Angstroms) |           |           |
|------------------|------------------|----------------|-------------------------|-----------|-----------|
|                  |                  |                | X                       | Y         | Z         |
| 1                | 6                | 0              | 2.094455                | 0.004399  | -0.328597 |
| 2                | 1                | 0              | 1.867613                | 0.258209  | -1.362532 |
| 3                | 1                | 0              | 2.291004                | -1.068132 | -0.246063 |
| 4                | 1                | 0              | 3.003300                | 0.536612  | -0.016713 |
| 5                | 7                | 0              | 0.984824                | 0.361914  | 0.515232  |
| 6                | 1                | 0              | -2.042380               | 1.363532  | 0.412286  |
| 7                | 1                | 0              | 1.080028                | 0.165043  | 1.505053  |
| 8                | 17               | 0              | -0.906906               | -0.930279 | -0.016794 |
| 9                | 1                | 0              | 0.396466                | 1.173215  | 0.295784  |
| 10               | 8                | 0              | -1.329890               | 1.353309  | -0.242169 |

**Standard orientation of TS-0W/M06-2X**

Cartesian coordinates of all the transition states optimized at the m062x/6-311+G\*\* level:

Standard orientation of TS-0W/M06-2X

State=1-A

Charge = 0 Multiplicity = 1

Lowest Harmonic Vibrational Frequency (LHVF) = -585.28 cm<sup>-1</sup>

Standard orientation:

| Center<br>Number | Atomic<br>Number | Atomic<br>Type | Coordinates (Angstroms) |           |           |
|------------------|------------------|----------------|-------------------------|-----------|-----------|
|                  |                  |                | X                       | Y         | Z         |
| 1                | 6                | 0              | 1.855218                | 0.071731  | -0.453703 |
| 2                | 1                | 0              | 1.429567                | 0.788693  | -1.152702 |
| 3                | 1                | 0              | 1.983663                | -0.894969 | -0.939851 |
| 4                | 1                | 0              | 2.827236                | 0.429444  | -0.101878 |
| 5                | 7                | 0              | 0.935111                | -0.075219 | 0.659117  |
| 6                | 1                | 0              | -1.836649               | 1.570156  | -0.253340 |
| 7                | 17               | 0              | -0.974672               | -0.778399 | -0.104038 |
| 8                | 1                | 0              | 0.617092                | 0.796253  | 1.074041  |
| 9                | 8                | 0              | -0.914934               | 1.427462  | -0.011553 |
| 10               | 1                | 0              | 1.190902                | -0.780337 | 1.343200  |

**Standard orientation of TS-1W/B3LYP**

Cartesian coordinates of all the transition states optimized at the b3lyp/6-311+G\*\* level:

Standard orientation of TS-1W/B3LYP

State=1-A

Charge = 0 Multiplicity = 1

Lowest Harmonic Vibrational Frequency (LHVF) = -186.34 cm<sup>-1</sup>

Standard orientation:

| Center<br>Number | Atomic<br>Number | Atomic<br>Type | Coordinates (Angstroms) |           |           |
|------------------|------------------|----------------|-------------------------|-----------|-----------|
|                  |                  |                | X                       | Y         | Z         |
| 1                | 7                | 0              | -1.402982               | 0.223887  | -0.462854 |
| 2                | 1                | 0              | -0.881786               | 1.117358  | -0.449541 |
| 3                | 6                | 0              | -2.488877               | 0.177494  | 0.549217  |
| 4                | 1                | 0              | -2.958197               | -0.802004 | 0.517344  |
| 5                | 1                | 0              | -2.057394               | 0.371511  | 1.527476  |
| 6                | 1                | 0              | -3.208722               | 0.954579  | 0.290073  |
| 7                | 8                | 0              | 1.146298                | 1.664447  | -0.010290 |
| 8                | 1                | 0              | 1.702784                | 2.414822  | -0.239576 |
| 9                | 17               | 0              | -0.015449               | -0.918117 | -0.164996 |
| 10               | 8                | 0              | 2.550039                | -0.563488 | 0.179393  |
| 11               | 1                | 0              | 2.843303                | -0.787874 | 1.070152  |
| 12               | 1                | 0              | 1.757742                | 0.850383  | 0.088118  |
| 13               | 1                | 0              | -1.751646               | 0.049369  | -1.407259 |

**Standard orientation of TS-1W/M06-2X**

Cartesian coordinates of all the transition states optimized at the m062x/6-311+G\*\* level:

Standard orientation of TS-1W/M06-2X

State=1-A

Charge = 0 Multiplicity = 1

Lowest Harmonic Vibrational Frequency (LHVF) = -166.96 cm<sup>-1</sup>

Standard orientation:

| Center<br>Number | Atomic<br>Number | Atomic<br>Type | Coordinates (Angstroms) |           |           |
|------------------|------------------|----------------|-------------------------|-----------|-----------|
|                  |                  |                | X                       | Y         | Z         |
| 1                | 7                | 0              | -1.471319               | 0.257983  | -0.474402 |
| 2                | 1                | 0              | -1.051031               | 1.196756  | -0.509165 |
| 3                | 6                | 0              | -2.520119               | 0.172979  | 0.576896  |
| 4                | 1                | 0              | -2.915597               | -0.838431 | 0.580587  |
| 5                | 1                | 0              | -2.058493               | 0.416261  | 1.529662  |
| 6                | 1                | 0              | -3.294835               | 0.894253  | 0.324657  |
| 7                | 8                | 0              | 1.427906                | 1.583561  | 0.001321  |
| 8                | 1                | 0              | 2.105280                | 2.262608  | -0.027246 |
| 9                | 17               | 0              | -0.083163               | -0.782435 | -0.182885 |
| 10               | 8                | 0              | 2.462273                | -0.736056 | 0.168272  |
| 11               | 1                | 0              | 2.864155                | -0.968355 | 1.009341  |
| 12               | 1                | 0              | 1.915855                | 0.670392  | 0.103376  |
| 13               | 1                | 0              | -1.853056               | 0.044106  | -1.399464 |

**Standard orientation of TS-2W/B3LYP**

Cartesian coordinates of all the transition states optimized at the b3lyp/6-311+G\*\* level:

Standard orientation of TS-2W/B3LYP

State=1-A

Charge = 0 Multiplicity = 1

Lowest Harmonic Vibrational Frequency (LHVF) = -634.22 cm<sup>-1</sup>

Standard orientation:

| Center<br>Number | Atomic<br>Number | Atomic<br>Type | Coordinates (Angstroms) |           |           |
|------------------|------------------|----------------|-------------------------|-----------|-----------|
|                  |                  |                | X                       | Y         | Z         |
| 1                | 7                | 0              | -1.708728               | 0.035457  | -0.417566 |
| 2                | 1                | 0              | -1.293651               | 1.003500  | -0.352545 |
| 3                | 6                | 0              | -2.731656               | -0.232431 | 0.619222  |
| 4                | 1                | 0              | -3.060069               | -1.266226 | 0.544342  |
| 5                | 1                | 0              | -2.294963               | -0.037877 | 1.595862  |
| 6                | 1                | 0              | -3.569389               | 0.443283  | 0.441481  |
| 7                | 8                | 0              | 2.252548                | 0.968493  | 0.301367  |
| 8                | 1                | 0              | 3.054163                | 1.361535  | -0.057278 |
| 9                | 17               | 0              | -0.164682               | -0.942505 | -0.239179 |
| 10               | 8                | 0              | -0.017798               | 2.149372  | -0.199956 |
| 11               | 1                | 0              | 0.894873                | 1.733421  | -0.000019 |
| 12               | 8                | 0              | 2.147018                | -1.451897 | 0.027956  |
| 13               | 1                | 0              | 2.279878                | -1.867568 | 0.887555  |
| 14               | 1                | 0              | 2.262356                | -0.316588 | 0.167328  |
| 15               | 1                | 0              | -2.066723               | -0.131483 | -1.358176 |
| 16               | 1                | 0              | -0.109994               | 2.919226  | 0.370193  |

**Standard orientation of TS-2W/M06-2X**



Cartesian coordinates of all the transition states optimized at the m062x/6-311+G\*\* level:

Standard orientation of TS-2W/M06-2X

State=1-A

Charge = 0 Multiplicity = 1

Lowest Harmonic Vibrational Frequency (LHVF) = -616.02 cm<sup>-1</sup>

Standard orientation:

| Center<br>Number | Atomic<br>Number | Atomic<br>Type | Coordinates (Angstroms) |           |           |
|------------------|------------------|----------------|-------------------------|-----------|-----------|
|                  |                  |                | X                       | Y         | Z         |
| 1                | 7                | 0              | 1.677014                | -0.019004 | -0.450074 |
| 2                | 1                | 0              | 1.325607                | 0.975505  | -0.425038 |
| 3                | 8                | 0              | -2.214139               | 0.992299  | 0.124391  |
| 4                | 1                | 0              | -2.895214               | 1.365726  | 0.687827  |
| 5                | 17               | 0              | 0.150167                | -0.901107 | -0.216848 |
| 6                | 8                | 0              | 0.127010                | 2.095815  | -0.039016 |
| 7                | 1                | 0              | 0.062879                | 2.968571  | -0.433928 |
| 8                | 1                | 0              | -0.809933               | 1.719174  | 0.032879  |
| 9                | 8                | 0              | -2.158435               | -1.421711 | 0.227804  |
| 10               | 1                | 0              | -2.593306               | -1.804928 | -0.538413 |
| 11               | 1                | 0              | -2.252937               | -0.165899 | 0.178140  |
| 12               | 1                | 0              | 2.040424                | -0.243803 | -1.377069 |
| 13               | 6                | 0              | 2.677765                | -0.281179 | 0.608331  |
| 14               | 1                | 0              | 2.240873                | 0.004977  | 1.561812  |
| 15               | 1                | 0              | 2.931954                | -1.337766 | 0.601757  |
| 16               | 1                | 0              | 3.555635                | 0.326146  | 0.393551  |

**Standard orientation of TS-3W/B3LYP**

Cartesian coordinates of all the transition states optimized at the b3lyp/6-311+G\*\* level:

Standard orientation of TS-3W/B3LYP

State=1-A

Charge = 0 Multiplicity = 1

Lowest Harmonic Vibrational Frequency (LHVF) = -625.27 cm<sup>-1</sup>

Standard orientation:

| Center<br>Number | Atomic<br>Number | Atomic<br>Type | Coordinates (Angstroms) |           |           |
|------------------|------------------|----------------|-------------------------|-----------|-----------|
|                  |                  |                | X                       | Y         | Z         |
| 1                | 7                | 0              | -1.992785               | -0.040881 | -0.357822 |
| 2                | 1                | 0              | -1.580123               | 0.954998  | -0.287653 |
| 3                | 6                | 0              | -2.983931               | -0.314449 | 0.711278  |
| 4                | 1                | 0              | -3.345551               | -1.336034 | 0.622928  |
| 5                | 1                | 0              | -2.506862               | -0.154881 | 1.675112  |
| 6                | 1                | 0              | -3.805565               | 0.390484  | 0.577800  |
| 7                | 8                | 0              | 1.748692                | 2.106299  | 0.031281  |
| 8                | 1                | 0              | 2.209538                | 2.574047  | -0.672337 |
| 9                | 17               | 0              | -0.538053               | -1.106012 | -0.280281 |
| 10               | 8                | 0              | -0.795218               | 2.297457  | -0.203895 |
| 11               | 1                | 0              | -1.101224               | 2.940366  | 0.444696  |
| 12               | 1                | 0              | 0.224374                | 2.226556  | -0.105847 |
| 13               | 8                | 0              | 1.660074                | -2.275901 | -0.144653 |
| 14               | 1                | 0              | 1.676028                | -2.819514 | 0.650772  |
| 15               | 1                | 0              | 2.171023                | -1.422190 | 0.085148  |
| 16               | 1                | 0              | -2.400899               | -0.177563 | -1.283384 |
| 17               | 8                | 0              | 2.811899                | -0.041417 | 0.407876  |
| 18               | 1                | 0              | 3.770973                | 0.023600  | 0.375750  |
| 19               | 1                | 0              | 2.284690                | 1.083691  | 0.194011  |

**Standard orientation of TS-3W/M06-2X**

Cartesian coordinates of all the transition states optimized at the m062x/6-311+G\*\* level:

Standard orientation of TS-3W/M06-2X

State=1-A

Charge = 0 Multiplicity = 1

Lowest Harmonic Vibrational Frequency (LHVF) = -657.58 cm<sup>-1</sup>

Standard orientation:

| Center<br>Number | Atomic<br>Number | Atomic<br>Type | Coordinates (Angstroms) |           |           |
|------------------|------------------|----------------|-------------------------|-----------|-----------|
|                  |                  |                | X                       | Y         | Z         |
| 1                | 7                | 0              | -1.970538               | -0.105663 | -0.389463 |
| 2                | 1                | 0              | -1.665523               | 0.908529  | -0.309250 |
| 3                | 6                | 0              | -2.923552               | -0.465604 | 0.681523  |
| 4                | 1                | 0              | -3.163548               | -1.523140 | 0.606298  |
| 5                | 1                | 0              | -2.455003               | -0.247838 | 1.638292  |
| 6                | 1                | 0              | -3.820286               | 0.138852  | 0.552644  |
| 7                | 8                | 0              | 1.703373                | 2.117932  | -0.033499 |
| 8                | 1                | 0              | 2.139701                | 2.490060  | -0.804061 |
| 9                | 17               | 0              | -0.436343               | -1.035130 | -0.288283 |
| 10               | 8                | 0              | -0.916871               | 2.308226  | -0.099290 |
| 11               | 1                | 0              | -1.199490               | 2.889742  | 0.611947  |
| 12               | 1                | 0              | 0.076144                | 2.249386  | -0.055266 |
| 13               | 8                | 0              | 1.611845                | -2.127488 | -0.155178 |
| 14               | 1                | 0              | 1.571591                | -2.733675 | 0.589592  |
| 15               | 1                | 0              | 2.249156                | -1.140847 | 0.172163  |
| 16               | 8                | 0              | 2.790643                | -0.129736 | 0.467260  |
| 17               | 1                | 0              | 3.726931                | -0.196136 | 0.266935  |
| 18               | 1                | 0              | 2.151182                | 1.218850  | 0.147175  |
| 19               | 1                | 0              | -2.369880               | -0.274764 | -1.312900 |

**Standard orientation of TS-0W'/B3LYP**

Cartesian coordinates of all the transition states optimized at the b3lyp/6-311+G\*\* level:

Standard orientation of TS-0W'/B3LYP

State=1-A

Charge = 0 Multiplicity = 1

Lowest Harmonic Vibrational Frequency (LHVF) = -375.00 cm<sup>-1</sup>

Standard orientation:

| Center<br>Number | Atomic<br>Number | Atomic<br>Type | Coordinates (Angstroms) |           |           |
|------------------|------------------|----------------|-------------------------|-----------|-----------|
|                  |                  |                | X                       | Y         | Z         |
| 1                | 6                | 0              | 0.899056                | 1.716360  | -0.027328 |
| 2                | 1                | 0              | 0.032682                | 2.327208  | 0.224467  |
| 3                | 1                | 0              | 1.154175                | 1.846360  | -1.081474 |
| 4                | 1                | 0              | 1.755930                | 2.013074  | 0.588290  |
| 5                | 7                | 0              | 0.538267                | 0.341195  | 0.232087  |
| 6                | 1                | 0              | -1.863527               | -1.065009 | 1.530234  |
| 7                | 17               | 0              | -1.576560               | -0.161606 | -0.873798 |
| 8                | 1                | 0              | -0.141482               | 0.090291  | 1.021643  |
| 9                | 8                | 0              | -1.591433               | -0.137035 | 1.511486  |
| 10               | 17               | 0              | 1.731353                | -0.826757 | -0.057713 |

## Standard orientation of TS-0W'/M06-2X

Cartesian coordinates of all the transition states optimized at the m062x /6-311+G\*\* level:

Standard orientation of TS-0W'/M06-2X

State=1-A

Charge = 0 Multiplicity = 1

Lowest Harmonic Vibrational Frequency (LHVF) = -563.10 cm<sup>-1</sup>

Standard orientation:

| Center<br>Number | Atomic<br>Number | Atomic<br>Type | Coordinates (Angstroms) |           |           |
|------------------|------------------|----------------|-------------------------|-----------|-----------|
|                  |                  |                | X                       | Y         | Z         |
| 1                | 6                | 0              | 0.452102                | 1.521107  | -0.774944 |
| 2                | 1                | 0              | -0.545234               | 1.957127  | -0.783030 |
| 3                | 1                | 0              | 0.719964                | 1.145692  | -1.761811 |
| 4                | 1                | 0              | 1.188980                | 2.250096  | -0.431656 |
| 5                | 7                | 0              | 0.395105                | 0.398075  | 0.154576  |
| 6                | 1                | 0              | -2.588161               | 0.160567  | 1.290427  |
| 7                | 17               | 0              | -1.184275               | -0.926081 | -0.494898 |
| 8                | 1                | 0              | -0.065145               | 0.610206  | 1.049574  |
| 9                | 8                | 0              | -1.914517               | 0.720427  | 0.890115  |
| 10               | 17               | 0              | 1.838827                | -0.473935 | 0.323322  |

## Standard orientation of TS-1W'/B3LYP

Cartesian coordinates of all the transition states optimized at the b3lyp/6-311+G\*\* level:

Standard orientation of TS-1W'/B3LYP

State=1-A

Charge = 0 Multiplicity = 1

Lowest Harmonic Vibrational Frequency (LHVF) = -226.42 cm<sup>-1</sup>

Standard orientation:

| Center<br>Number | Atomic<br>Number | Atomic<br>Type | Coordinates (Angstroms) |           |           |
|------------------|------------------|----------------|-------------------------|-----------|-----------|
|                  |                  |                | X                       | Y         | Z         |
| 1                | 1                | 0              | -0.228861               | 0.948406  | 0.374049  |
| 2                | 8                | 0              | 3.070222                | -0.287447 | -0.235614 |
| 3                | 1                | 0              | 3.400052                | -0.322641 | -1.141937 |
| 4                | 17               | 0              | 0.633964                | -1.007583 | -0.164049 |
| 5                | 6                | 0              | -1.381816               | -0.314212 | 1.655796  |
| 6                | 7                | 0              | -0.805546               | 0.059408  | 0.337152  |
| 7                | 1                | 0              | -0.551855               | -0.363635 | 2.358572  |
| 8                | 1                | 0              | -2.083417               | 0.466052  | 1.947937  |
| 9                | 1                | 0              | -1.878173               | -1.276873 | 1.568096  |
| 10               | 8                | 0              | 1.372334                | 1.695668  | 0.216879  |
| 11               | 1                | 0              | 1.716761                | 2.323895  | 0.859794  |
| 12               | 1                | 0              | 2.099002                | 0.994296  | 0.043044  |
| 13               | 17               | 0              | -2.050685               | 0.268416  | -0.903864 |

## Standard orientation of TS-1W'/M06-2X

Cartesian coordinates of all the transition states optimized at the m062x /6-311+G\*\* level:

Standard orientation of TS-1W'/M06-2X

State=1-A

Charge = 0 Multiplicity = 1

Lowest Harmonic Vibrational Frequency (LHVF) = -221.38 cm<sup>-1</sup>

Standard orientation:

| Center<br>Number | Atomic<br>Number | Atomic<br>Type | Coordinates (Angstroms) |           |           |
|------------------|------------------|----------------|-------------------------|-----------|-----------|
|                  |                  |                | X                       | Y         | Z         |
| 1                | 6                | 0              | 1.399371                | 0.832034  | 1.451628  |
| 2                | 1                | 0              | 2.170890                | 1.558980  | 1.208606  |
| 3                | 1                | 0              | 1.802869                | -0.007492 | 2.010954  |
| 4                | 1                | 0              | 0.571623                | 1.300174  | 1.979810  |
| 5                | 7                | 0              | 0.844955                | 0.308969  | 0.171602  |
| 6                | 1                | 0              | -3.571934               | -0.639972 | 0.689992  |
| 7                | 17               | 0              | -0.574468               | -0.742268 | 0.414972  |
| 8                | 1                | 0              | 0.390775                | 1.066602  | -0.377175 |
| 9                | 8                | 0              | -2.977273               | -0.691916 | -0.063664 |
| 10               | 8                | 0              | -1.636213               | 1.455601  | -0.773575 |
| 11               | 1                | 0              | -2.152601               | 2.145679  | -1.195207 |
| 12               | 1                | 0              | -2.267329               | 0.698925  | -0.517531 |
| 13               | 17               | 0              | 2.083450                | -0.398165 | -0.827473 |

## Standard orientation of TS-2W'/B3LYP

Cartesian coordinates of all the transition states optimized at the b3lyp/6-311+G\*\* level:

Standard orientation of TS-2W'/B3LYP

State=1-A

Charge = 0 Multiplicity = 1

Lowest Harmonic Vibrational Frequency (LHVF) = -594.86 cm<sup>-1</sup>

Standard orientation:

| Center<br>Number | Atomic<br>Number | Atomic<br>Type | Coordinates (Angstroms) |           |           |
|------------------|------------------|----------------|-------------------------|-----------|-----------|
|                  |                  |                | X                       | Y         | Z         |
| 1                | 7                | 0              | 1.139938                | 0.070935  | 0.323711  |
| 2                | 1                | 0              | 0.628024                | 1.047440  | 0.233368  |
| 3                | 8                | 0              | -2.698525               | 1.028685  | -0.256997 |
| 4                | 1                | 0              | -3.456186               | 1.455678  | 0.154452  |
| 5                | 17               | 0              | -0.394552               | -0.964065 | 0.117119  |
| 6                | 8                | 0              | -0.445510               | 2.093942  | 0.172146  |
| 7                | 1                | 0              | -0.300912               | 2.821215  | -0.442418 |
| 8                | 1                | 0              | -1.406705               | 1.695347  | -0.008752 |
| 9                | 8                | 0              | -2.658054               | -1.410230 | -0.070520 |
| 10               | 1                | 0              | -2.821079               | -1.793646 | -0.940861 |
| 11               | 1                | 0              | -2.755710               | -0.288620 | -0.165370 |
| 12               | 6                | 0              | 1.808440                | -0.136748 | 1.629176  |
| 13               | 1                | 0              | 1.052630                | 0.020765  | 2.397501  |
| 14               | 1                | 0              | 2.206438                | -1.147263 | 1.682900  |
| 15               | 1                | 0              | 2.604082                | 0.601014  | 1.726033  |
| 16               | 17               | 0              | 2.267253                | -0.082239 | -1.025055 |



## Standard orientation of TS-2W'/M06-2X

Cartesian coordinates of all the transition states optimized at the m062x /6-311+G\*\* level:

Standard orientation of TS-2W'/M06-2X

State=1-A

Charge = 0 Multiplicity = 1

Lowest Harmonic Vibrational Frequency (LHVF) = -626.69 cm<sup>-1</sup>

Standard orientation:

| Center<br>Number | Atomic<br>Number | Atomic<br>Type | Coordinates (Angstroms) |           |           |
|------------------|------------------|----------------|-------------------------|-----------|-----------|
|                  |                  |                | X                       | Y         | Z         |
| 1                | 7                | 0              | 1.111137                | 0.072029  | 0.318380  |
| 2                | 1                | 0              | 0.577556                | 1.102156  | 0.246367  |
| 3                | 8                | 0              | -2.625963               | 1.018045  | -0.253604 |
| 4                | 1                | 0              | -3.397689               | 1.421603  | 0.150472  |
| 5                | 17               | 0              | -0.395821               | -0.914027 | 0.118949  |
| 6                | 8                | 0              | -0.388668               | 2.057946  | 0.186709  |
| 7                | 1                | 0              | -0.223106               | 2.790893  | -0.413756 |
| 8                | 1                | 0              | -1.345495               | 1.664737  | 0.000088  |
| 9                | 8                | 0              | -2.618376               | -1.405061 | -0.066345 |
| 10               | 1                | 0              | -2.805007               | -1.827512 | -0.909717 |
| 11               | 1                | 0              | -2.699197               | -0.106621 | -0.181333 |
| 12               | 6                | 0              | 1.790575                | -0.176045 | 1.605506  |
| 13               | 1                | 0              | 1.050076                | -0.010399 | 2.386643  |
| 14               | 1                | 0              | 2.158746                | -1.199636 | 1.634808  |
| 15               | 1                | 0              | 2.608161                | 0.536305  | 1.701073  |
| 16               | 17               | 0              | 2.196915                | -0.096967 | -1.025444 |

## Standard orientation of TS-3W'/B3LYP

Cartesian coordinates of all the transition states optimized at the b3lyp/6-311+G\*\* level:

Standard orientation of TS-3W'/B3LYP

State=1-A

Charge = 0 Multiplicity = 1

Lowest Harmonic Vibrational Frequency (LHVF) = -550.89 cm<sup>-1</sup>

Standard orientation:

| Center<br>Number | Atomic<br>Number | Atomic<br>Type | Coordinates (Angstroms) |           |           |
|------------------|------------------|----------------|-------------------------|-----------|-----------|
|                  |                  |                | X                       | Y         | Z         |
| 1                | 7                | 0              | -1.430518               | 0.024898  | 0.314265  |
| 2                | 1                | 0              | -0.954311               | 1.066081  | 0.277224  |
| 3                | 6                | 0              | -2.102907               | -0.250203 | 1.607003  |
| 4                | 1                | 0              | -2.493314               | -1.265175 | 1.617434  |
| 5                | 1                | 0              | -1.351819               | -0.119713 | 2.385281  |
| 6                | 1                | 0              | -2.904707               | 0.476305  | 1.731806  |
| 7                | 8                | 0              | 2.216358                | 2.062663  | -0.165921 |
| 8                | 1                | 0              | 2.487304                | 2.490994  | -0.984340 |
| 9                | 17               | 0              | 0.020586                | -1.076091 | 0.062671  |
| 10               | 8                | 0              | -0.262786               | 2.260635  | 0.182472  |
| 11               | 1                | 0              | -0.421567               | 2.870338  | 0.912041  |
| 12               | 1                | 0              | 0.772725                | 2.175462  | 0.045296  |
| 13               | 8                | 0              | 2.057806                | -2.208545 | -0.227653 |
| 14               | 1                | 0              | 2.203467                | -2.749522 | 0.557464  |
| 15               | 1                | 0              | 2.653582                | -1.355382 | -0.118541 |
| 16               | 8                | 0              | 3.360172                | -0.075274 | 0.046962  |
| 17               | 1                | 0              | 4.249742                | -0.048167 | -0.318063 |
| 18               | 1                | 0              | 2.765462                | 1.068162  | -0.093062 |
| 19               | 17               | 0              | -2.570463               | -0.076749 | -1.035688 |

## Standard orientation of TS-3W'/M06-2X

Cartesian coordinates of all the transition states optimized at the m062x /6-311+G\*\* level:

Standard orientation of TS-3W'/M06-2X

State=1-A

Charge = 0 Multiplicity = 1

Lowest Harmonic Vibrational Frequency (LHVF) = -647.70 cm<sup>-1</sup>

Standard orientation:

| Center<br>Number | Atomic<br>Number | Atomic<br>Type | Coordinates (Angstroms) |           |           |
|------------------|------------------|----------------|-------------------------|-----------|-----------|
|                  |                  |                | X                       | Y         | Z         |
| 1                | 7                | 0              | -1.408697               | 0.004211  | 0.309251  |
| 2                | 1                | 0              | -0.986087               | 1.063896  | 0.329676  |
| 3                | 6                | 0              | -2.092721               | -0.353552 | 1.569653  |
| 4                | 1                | 0              | -2.426468               | -1.388166 | 1.521759  |
| 5                | 1                | 0              | -1.365268               | -0.220305 | 2.369013  |
| 6                | 1                | 0              | -2.934613               | 0.323044  | 1.705091  |
| 7                | 8                | 0              | 2.131905                | 2.051512  | -0.221025 |
| 8                | 1                | 0              | 2.364523                | 2.398579  | -1.086284 |
| 9                | 17               | 0              | 0.076971                | -1.013092 | 0.055373  |
| 10               | 8                | 0              | -0.326170               | 2.267423  | 0.272050  |
| 11               | 1                | 0              | -0.449335               | 2.844537  | 1.032129  |
| 12               | 1                | 0              | 0.682422                | 2.182759  | 0.086164  |
| 13               | 8                | 0              | 2.009170                | -2.116328 | -0.232997 |
| 14               | 1                | 0              | 2.123121                | -2.703684 | 0.519907  |
| 15               | 1                | 0              | 2.688259                | -1.182776 | -0.077103 |
| 16               | 8                | 0              | 3.301749                | -0.120048 | 0.092654  |
| 17               | 1                | 0              | 4.177729                | -0.158527 | -0.297600 |
| 18               | 1                | 0              | 2.631849                | 1.134628  | -0.109896 |
| 19               | 17               | 0              | -2.490039               | -0.096474 | -1.047196 |

## Standard orientation of TS-DCMA/B3LYP

Cartesian coordinates of all the transition states optimized at the b3lyp/6-311+G\*\* level:

Standard orientation of TS-DCMA/B3LYP

State=1-A

Charge = 0 Multiplicity = 1

Lowest Harmonic Vibrational Frequency (LHVF) = -223.37 cm<sup>-1</sup>

Standard orientation:

| Center<br>Number | Atomic<br>Number | Atomic<br>Type | Coordinates (Angstroms) |           |           |
|------------------|------------------|----------------|-------------------------|-----------|-----------|
|                  |                  |                | X                       | Y         | Z         |
| 1                | 6                | 0              | 0.966903                | -0.557504 | 1.590612  |
| 2                | 1                | 0              | 2.044688                | -0.510407 | 1.755388  |
| 3                | 1                | 0              | 0.646908                | -1.601813 | 1.665851  |
| 4                | 1                | 0              | 0.406806                | 0.036507  | 2.311583  |
| 5                | 7                | 0              | 0.566034                | -0.116507 | 0.258650  |
| 6                | 1                | 0              | -1.633249               | 2.425581  | -1.195821 |
| 7                | 17               | 0              | -2.111320               | -1.018365 | 0.027721  |
| 8                | 1                | 0              | -1.661945               | 1.137621  | -0.312808 |
| 9                | 8                | 0              | -1.339444               | 2.066153  | -0.350672 |
| 10               | 8                | 0              | 1.171661                | 1.734497  | 0.202001  |
| 11               | 1                | 0              | 1.331822                | 2.060479  | 1.102767  |
| 12               | 1                | 0              | 0.224364                | 2.005886  | -0.046775 |
| 13               | 17               | 0              | 1.535979                | -0.852134 | -0.936253 |

## Standard orientation of TS-DCMA/M06-2X

Cartesian coordinates of all the transition states optimized at the m062x/6-311+G\*\* level:

Standard orientation of TS-DCMA/M06-2X

State=1-A

Charge = 0 Multiplicity = 1

Lowest Harmonic Vibrational Frequency (LHVF) = -441.57 cm<sup>-1</sup>

Standard orientation:

| Center<br>Number | Atomic<br>Number | Atomic<br>Type | Coordinates (Angstroms) |           |           |
|------------------|------------------|----------------|-------------------------|-----------|-----------|
|                  |                  |                | X                       | Y         | Z         |
| 1                | 7                | 0              | -1.408697               | 0.004211  | 0.309251  |
| 2                | 1                | 0              | -0.986087               | 1.063896  | 0.329676  |
| 3                | 6                | 0              | -2.092721               | -0.353552 | 1.569653  |
| 4                | 1                | 0              | -2.426468               | -1.388166 | 1.521759  |
| 5                | 1                | 0              | -1.365268               | -0.220305 | 2.369013  |
| 6                | 1                | 0              | -2.934613               | 0.323044  | 1.705091  |
| 7                | 8                | 0              | 2.131905                | 2.051512  | -0.221025 |
| 8                | 1                | 0              | 2.364523                | 2.398579  | -1.086284 |
| 9                | 17               | 0              | 0.076971                | -1.013092 | 0.055373  |
| 10               | 8                | 0              | -0.326170               | 2.267423  | 0.272050  |
| 11               | 1                | 0              | -0.449335               | 2.844537  | 1.032129  |
| 12               | 1                | 0              | 0.682422                | 2.182759  | 0.086164  |
| 13               | 8                | 0              | 2.009170                | -2.116328 | -0.232997 |
| 14               | 1                | 0              | 2.123121                | -2.703684 | 0.519907  |
| 15               | 1                | 0              | 2.688259                | -1.182776 | -0.077103 |
| 16               | 8                | 0              | 3.301749                | -0.120048 | 0.092654  |
| 17               | 1                | 0              | 4.177729                | -0.158527 | -0.297600 |
| 18               | 1                | 0              | 2.631849                | 1.134628  | -0.109896 |
| 19               | 17               | 0              | -2.490039               | -0.096474 | -1.047196 |

## Standard orientation of TS-NCNMHA/B3LYP

Cartesian coordinates of all the transition states optimized at the b3lyp/6-311+G\*\* level:

Standard orientation of TS-NCNMHA/B3LYP

State=1-A

Charge = 0 Multiplicity = 1

Lowest Harmonic Vibrational Frequency (LHVF) = -216.80 cm<sup>-1</sup>

Standard orientation:

| Center<br>Number | Atomic<br>Number | Atomic<br>Type | Coordinates (Angstroms) |           |           |
|------------------|------------------|----------------|-------------------------|-----------|-----------|
|                  |                  |                | X                       | Y         | Z         |
| 1                | 6                | 0              | -2.230308               | -0.388291 | 0.071314  |
| 2                | 7                | 0              | -1.001800               | 0.299851  | 0.389589  |
| 3                | 1                | 0              | -2.142059               | -1.414518 | 0.421723  |
| 4                | 8                | 0              | -0.737202               | 1.191521  | -0.448470 |
| 5                | 8                | 0              | 1.591663                | 1.573082  | 0.060825  |
| 6                | 1                | 0              | 0.288964                | 1.554824  | -0.177874 |
| 7                | 1                | 0              | 1.859483                | 1.993732  | 0.889385  |
| 8                | 1                | 0              | 1.773674                | 0.603268  | 0.139251  |
| 9                | 1                | 0              | -2.499617               | -0.310634 | -0.982054 |
| 10               | 1                | 0              | -2.989111               | 0.108515  | 0.695196  |
| 11               | 17               | 0              | 1.015731                | -1.436542 | -0.061145 |

## Standard orientation of TS-NCNMHA/M06-2X

Cartesian coordinates of all the transition states optimized at the m062x/6-311+G\*\* level:

Standard orientation of TS-NCNMHA/M06-2X

State=1-A

Charge = 0 Multiplicity = 1

Lowest Harmonic Vibrational Frequency (LHVF) = -193.76 cm<sup>-1</sup>

Standard orientation:

| Center<br>Number | Atomic<br>Number | Atomic<br>Type | Coordinates (Angstroms) |           |           |
|------------------|------------------|----------------|-------------------------|-----------|-----------|
|                  |                  |                | X                       | Y         | Z         |
| 1                | 6                | 0              | 2.118879                | 0.370551  | -0.116599 |
| 2                | 7                | 0              | 0.715208                | 0.604009  | -0.389519 |
| 3                | 1                | 0              | 2.425183                | -0.519859 | -0.655568 |
| 4                | 8                | 0              | 0.199873                | 1.309505  | 0.498166  |
| 5                | 8                | 0              | -2.115051               | 0.914936  | -0.078275 |
| 6                | 1                | 0              | -0.853780               | 1.342528  | 0.242858  |
| 7                | 1                | 0              | -2.523185               | 1.281625  | -0.871644 |
| 8                | 1                | 0              | -1.992991               | -0.042759 | -0.221209 |
| 9                | 1                | 0              | 2.320655                | 0.316506  | 0.952445  |
| 10               | 1                | 0              | 2.622268                | 1.245372  | -0.548930 |
| 11               | 17               | 0              | -0.258615               | -1.639430 | 0.068774  |

## Standard orientation of TS-NSM/B3LYP

Cartesian coordinates of all the transition states optimized at the b3lyp/6-311+G\*\* level:

Standard orientation of TS-NSM/B3LYP

State=1-A

Charge = 0 Multiplicity = 1

Lowest Harmonic Vibrational Frequency (LHVF) = -344.76 cm<sup>-1</sup>

Standard orientation:

| Center<br>Number | Atomic<br>Number | Atomic<br>Type | Coordinates (Angstroms) |           |           |
|------------------|------------------|----------------|-------------------------|-----------|-----------|
|                  |                  |                | X                       | Y         | Z         |
| 1                | 6                | 0              | -2.085085               | 1.143378  | -0.037344 |
| 2                | 7                | 0              | -1.495169               | -0.191500 | 0.109482  |
| 3                | 8                | 0              | 0.411312                | -0.075742 | 0.146321  |
| 4                | 8                | 0              | -2.121400               | -1.158065 | -0.128374 |
| 5                | 1                | 0              | 0.493149                | -0.961344 | 0.539237  |
| 6                | 17               | 0              | 2.512845                | 0.055255  | -0.061392 |
| 7                | 1                | 0              | -3.122756               | 1.064831  | -0.356204 |
| 8                | 1                | 0              | -1.974624               | 1.635363  | 0.931852  |
| 9                | 1                | 0              | -1.456743               | 1.672515  | -0.757105 |



## Standard orientation of TS-NSM/M06-2X

Cartesian coordinates of all the transition states optimized at the m062x/6-311+G\*\* level:

Standard orientation of TS-NSM/M06-2X

State=1-A

Charge = 0 Multiplicity = 1

Lowest Harmonic Vibrational Frequency (LHVF) = -585.25 cm<sup>-1</sup>

Standard orientation:

| Center<br>Number | Atomic<br>Number | Atomic<br>Type | Coordinates (Angstroms) |           |           |
|------------------|------------------|----------------|-------------------------|-----------|-----------|
|                  |                  |                | X                       | Y         | Z         |
| 1                | 6                | 0              | -2.063286               | 1.136694  | -0.019432 |
| 2                | 7                | 0              | -1.447428               | -0.187186 | 0.073022  |
| 3                | 8                | 0              | 0.387603                | -0.073680 | 0.077436  |
| 4                | 8                | 0              | -2.076063               | -1.157384 | -0.084788 |
| 5                | 1                | 0              | 0.482190                | -0.980113 | 0.415641  |
| 6                | 17               | 0              | 2.472951                | 0.058236  | -0.037485 |
| 7                | 1                | 0              | -3.132319               | 1.035389  | -0.191544 |
| 8                | 1                | 0              | -1.824272               | 1.649055  | 0.913315  |
| 9                | 1                | 0              | -1.546367               | 1.644316  | -0.835909 |

## Standard orientation of TS-DCMA-1/B3LYP

Cartesian coordinates of all the transition states optimized at the b3lyp/6-311+G\*\* level:

Standard orientation of TS-DCMA-1/B3LYP

State=1-A

Charge = 0 Multiplicity = 1

Lowest Harmonic Vibrational Frequency (LHVF) = -511.66 cm<sup>-1</sup>

Standard orientation:

| Center<br>Number | Atomic<br>Number | Atomic<br>Type | Coordinates (Angstroms) |           |           |
|------------------|------------------|----------------|-------------------------|-----------|-----------|
|                  |                  |                | X                       | Y         | Z         |
| 1                | 6                | 0              | 0.359406                | 1.435297  | 0.740556  |
| 2                | 1                | 0              | 0.027698                | 1.726211  | 1.742368  |
| 3                | 1                | 0              | -0.685890               | 1.477077  | 0.130895  |
| 4                | 1                | 0              | 0.971290                | 2.153867  | 0.191747  |
| 5                | 7                | 0              | 0.787206                | 0.135875  | 0.769237  |
| 6                | 17               | 0              | 1.893968                | -0.228599 | -0.483816 |
| 7                | 17               | 0              | -1.180928               | -1.408512 | 0.164342  |
| 8                | 8                | 0              | -2.017272               | 1.365077  | -0.556186 |
| 9                | 1                | 0              | -2.052081               | 0.379122  | -0.525909 |
| 10               | 1                | 0              | -1.911397               | 1.611089  | -1.486557 |

## Standard orientation of TS-DCMA-1/M06-2X

Cartesian coordinates of all the transition states optimized at the m062x/6-311+G\*\* level:

Standard orientation of TS-DCMA-1/M06-2X

State=1-A

Charge = 0 Multiplicity = 1

Lowest Harmonic Vibrational Frequency (LHVF) = -1123.03 cm<sup>-1</sup>

Standard orientation:

| Center<br>Number | Atomic<br>Number | Atomic<br>Type | Coordinates (Angstroms) |           |           |
|------------------|------------------|----------------|-------------------------|-----------|-----------|
|                  |                  |                | X                       | Y         | Z         |
| 1                | 6                | 0              | 0.261062                | 1.315961  | 0.911889  |
| 2                | 1                | 0              | -0.115474               | 1.484972  | 1.921069  |
| 3                | 1                | 0              | -0.746828               | 1.397941  | 0.202179  |
| 4                | 1                | 0              | 0.856340                | 2.104716  | 0.448026  |
| 5                | 7                | 0              | 0.745460                | 0.047322  | 0.793614  |
| 6                | 17               | 0              | 1.792812                | -0.118958 | -0.534873 |
| 7                | 17               | 0              | -1.054792               | -1.411158 | 0.143610  |
| 8                | 8                | 0              | -1.938478               | 1.341347  | -0.597498 |
| 9                | 1                | 0              | -2.038868               | 0.373811  | -0.683152 |
| 10               | 1                | 0              | -1.778272               | 1.692716  | -1.483298 |

## Standard orientation of TS-DCMA-2/B3LYP

Cartesian coordinates of all the transition states optimized at the b3lyp/6-311+G\*\* level:

Standard orientation of TS-DCMA-2/B3LYP

State=1-A

Charge = 0 Multiplicity = 1

Lowest Harmonic Vibrational Frequency (LHVF) = -413.05 cm<sup>-1</sup>

Standard orientation:

| Center<br>Number | Atomic<br>Number | Atomic<br>Type | Coordinates (Angstroms) |           |           |
|------------------|------------------|----------------|-------------------------|-----------|-----------|
|                  |                  |                | X                       | Y         | Z         |
| 1                | 6                | 0              | -1.415018               | 1.641469  | -0.028445 |
| 2                | 1                | 0              | -2.455470               | 1.917283  | -0.170015 |
| 3                | 7                | 0              | -1.041942               | 0.437542  | 0.077978  |
| 4                | 8                | 0              | 0.698624                | 0.136897  | 0.015316  |
| 5                | 1                | 0              | 0.730932                | -0.375783 | 0.841492  |
| 6                | 1                | 0              | -0.635448               | 2.393858  | 0.032189  |
| 7                | 17               | 0              | 2.898737                | -0.184797 | -0.039135 |
| 8                | 17               | 0              | -2.160225               | -0.870623 | -0.031534 |

## Standard orientation of TS-DCMA-2/M06-2X

Cartesian coordinates of all the transition states optimized at the m062x/6-311+G\*\* level:

Standard orientation of TS-DCMA-2/M06-2X

Lowest Harmonic Vibrational Frequency (LHVF) = -624.87 cm<sup>-1</sup>

Standard orientation:

| Center<br>Number | Atomic<br>Number | Atomic<br>Type | Coordinates (Angstroms) |           |           |
|------------------|------------------|----------------|-------------------------|-----------|-----------|
|                  |                  |                | X                       | Y         | Z         |
| 1                | 6                | 0              | -1.422298               | 1.627154  | -0.038397 |
| 2                | 1                | 0              | -2.467086               | 1.876238  | -0.201842 |
| 3                | 7                | 0              | -1.026575               | 0.436256  | 0.087033  |
| 4                | 8                | 0              | 0.718720                | 0.139990  | 0.031285  |
| 5                | 1                | 0              | 0.735703                | -0.284827 | 0.905713  |
| 6                | 1                | 0              | -0.657084               | 2.394479  | 0.028436  |
| 7                | 17               | 0              | 2.830919                | -0.179759 | -0.046394 |
| 8                | 17               | 0              | -2.103947               | -0.874507 | -0.033690 |

## Standard orientation of TS-DCMA-3/B3LYP

Cartesian coordinates of all the transition states optimized at the b3lyp/6-311+G\*\* level:

Standard orientation of TS-DCMA-3/B3LYP

State=1-A

Charge = 0 Multiplicity = 1

Lowest Harmonic Vibrational Frequency (LHVF) = -177.95 cm<sup>-1</sup>

Standard orientation:

| Center<br>Number | Atomic<br>Number | Atomic<br>Type | Coordinates (Angstroms) |           |           |
|------------------|------------------|----------------|-------------------------|-----------|-----------|
|                  |                  |                | X                       | Y         | Z         |
| 1                | 6                | 0              | 0.102657                | 0.096018  | 1.336102  |
| 2                | 1                | 0              | -0.147200               | -0.800695 | 1.884978  |
| 3                | 7                | 0              | -0.655522               | 0.471527  | 0.355074  |
| 4                | 8                | 0              | -0.204740               | 1.422787  | -0.489108 |
| 5                | 1                | 0              | 0.694699                | 1.049772  | -0.752672 |
| 6                | 1                | 0              | 0.822165                | 0.811076  | 1.702500  |
| 7                | 17               | 0              | 2.149609                | -0.407983 | -0.268734 |
| 8                | 17               | 0              | -1.900141               | -0.551973 | -0.285623 |

## Standard orientation of TS-DCMA-3/M06-2X

Cartesian coordinates of all the transition states optimized at the m062x/6-311+G\*\* level:

Standard orientation of TS-DCMA-3/M06-2X

Lowest Harmonic Vibrational Frequency (LHVF) = -217.99 cm<sup>-1</sup>

Standard orientation:

| Center<br>Number | Atomic<br>Number | Atomic<br>Type | Coordinates (Angstroms) |           |           |
|------------------|------------------|----------------|-------------------------|-----------|-----------|
|                  |                  |                | X                       | Y         | Z         |
| 1                | 6                | 0              | 0.101814                | 0.314743  | 1.313594  |
| 2                | 1                | 0              | -0.105931               | -0.514748 | 1.976078  |
| 3                | 7                | 0              | -0.657280               | 0.506059  | 0.293308  |
| 4                | 8                | 0              | -0.284684               | 1.397184  | -0.643661 |
| 5                | 1                | 0              | 0.597697                | 1.038871  | -0.931138 |
| 6                | 1                | 0              | 0.802306                | 1.099509  | 1.558155  |
| 7                | 17               | 0              | 2.107273                | -0.439833 | -0.222144 |
| 8                | 17               | 0              | -1.814716               | -0.632637 | -0.212475 |

## Standard orientation of TS-NCMI/B3LYP

Cartesian coordinates of all the transition states optimized at the b3lyp/6-311+G\*\* level:

Standard orientation of TS-NCMI/B3LYP

State=1-A

Charge = 0 Multiplicity = 1

Lowest Harmonic Vibrational Frequency (LHVF) = -413.05 cm<sup>-1</sup>

Standard orientation:

| Center<br>Number | Atomic<br>Number | Atomic<br>Type | Coordinates (Angstroms) |           |           |
|------------------|------------------|----------------|-------------------------|-----------|-----------|
|                  |                  |                | X                       | Y         | Z         |
| 1                | 6                | 0              | -1.415018               | 1.641469  | -0.028445 |
| 2                | 1                | 0              | -2.455470               | 1.917283  | -0.170015 |
| 3                | 7                | 0              | -1.041942               | 0.437542  | 0.077978  |
| 4                | 8                | 0              | 0.698624                | 0.136897  | 0.015316  |
| 5                | 1                | 0              | 0.730932                | -0.375783 | 0.841492  |
| 6                | 1                | 0              | -0.635448               | 2.393858  | 0.032189  |
| 7                | 17               | 0              | 2.898737                | -0.184797 | -0.039135 |
| 8                | 17               | 0              | -2.160225               | -0.870623 | -0.031534 |



## Standard orientation of TS-NCMI/M06-2X

Cartesian coordinates of all the transition states optimized at the m062x/6-311+G\*\* level:

Standard orientation of TS-NCMI/M06-2X

State=1-A

Charge = 0 Multiplicity = 1

Lowest Harmonic Vibrational Frequency (LHVF) = -624.87 cm<sup>-1</sup>

Standard orientation:

| Center<br>Number | Atomic<br>Number | Atomic<br>Type | Coordinates (Angstroms) |           |           |
|------------------|------------------|----------------|-------------------------|-----------|-----------|
|                  |                  |                | X                       | Y         | Z         |
| 1                | 6                | 0              | -1.422298               | 1.627154  | -0.038397 |
| 2                | 1                | 0              | -2.467086               | 1.876238  | -0.201842 |
| 3                | 7                | 0              | -1.026575               | 0.436256  | 0.087033  |
| 4                | 8                | 0              | 0.718720                | 0.139990  | 0.031285  |
| 5                | 1                | 0              | 0.735703                | -0.284827 | 0.905713  |
| 6                | 1                | 0              | -0.657084               | 2.394479  | 0.028436  |
| 7                | 17               | 0              | 2.830919                | -0.179759 | -0.046394 |
| 8                | 17               | 0              | -2.103947               | -0.874507 | -0.033690 |

## Standard orientation of TS-NCNHMI<sup>+</sup>/B3LYP

Cartesian coordinates of all the transition states optimized at the b3lyp/6-311+G\*\* level:

Standard orientation of TS-NCNHMI<sup>+</sup>/B3LYP

State=1-A

Charge = 0 Multiplicity = 1

Lowest Harmonic Vibrational Frequency (LHVF) = -177.95 cm<sup>-1</sup>

Standard orientation:

| Center<br>Number | Atomic<br>Number | Atomic<br>Type | Coordinates (Angstroms) |           |           |
|------------------|------------------|----------------|-------------------------|-----------|-----------|
|                  |                  |                | X                       | Y         | Z         |
| 1                | 6                | 0              | 0.102657                | 0.096018  | 1.336102  |
| 2                | 1                | 0              | -0.147200               | -0.800695 | 1.884978  |
| 3                | 7                | 0              | -0.655522               | 0.471527  | 0.355074  |
| 4                | 8                | 0              | -0.204740               | 1.422787  | -0.489108 |
| 5                | 1                | 0              | 0.694699                | 1.049772  | -0.752672 |
| 6                | 1                | 0              | 0.822165                | 0.811076  | 1.702500  |
| 7                | 17               | 0              | 2.149609                | -0.407983 | -0.268734 |
| 8                | 17               | 0              | -1.900141               | -0.551973 | -0.285623 |

## Standard orientation of TS-NCNHMI<sup>+</sup>/M06-2X

Cartesian coordinates of all the transition states optimized at the m62x/6-311+G\*\* level:

Standard orientation of TS- NCNHMI<sup>+</sup>/M06-2X

State=1-A

Charge = 0 Multiplicity = 1

Lowest Harmonic Vibrational Frequency (LHVF) = -217.99 cm<sup>-1</sup>

Standard orientation:

| Center<br>Number | Atomic<br>Number | Atomic<br>Type | Coordinates (Angstroms) |           |           |
|------------------|------------------|----------------|-------------------------|-----------|-----------|
|                  |                  |                | X                       | Y         | Z         |
| 1                | 6                | 0              | 0.101814                | 0.314743  | 1.313594  |
| 2                | 1                | 0              | -0.105931               | -0.514748 | 1.976078  |
| 3                | 7                | 0              | -0.657280               | 0.506059  | 0.293308  |
| 4                | 8                | 0              | -0.284684               | 1.397184  | -0.643661 |
| 5                | 1                | 0              | 0.597697                | 1.038871  | -0.931138 |
| 6                | 1                | 0              | 0.802306                | 1.099509  | 1.558155  |
| 7                | 17               | 0              | 2.107273                | -0.439833 | -0.222144 |
| 8                | 17               | 0              | -1.814716               | -0.632637 | -0.212475 |

## Standard orientation of TS-NCCMHA/B3LYP

Cartesian coordinates of all the transition states optimized at the b3lyp/6-311+G\*\* level:

Standard orientation of TS-NCCMHA/B3LYP

State=1-A

Charge = 0 Multiplicity = 1

Lowest Harmonic Vibrational Frequency (LHVF) = -660.79 cm<sup>-1</sup>

Standard orientation:

| Center<br>Number | Atomic<br>Number | Atomic<br>Type | Coordinates (Angstroms) |           |           |
|------------------|------------------|----------------|-------------------------|-----------|-----------|
|                  |                  |                | X                       | Y         | Z         |
| 1                | 6                | 0              | 1.215951                | -0.624939 | 0.383620  |
| 2                | 7                | 0              | 0.138647                | 0.221454  | -0.162117 |
| 3                | 1                | 0              | 1.124394                | -1.617819 | -0.038223 |
| 4                | 8                | 0              | -0.176574               | 1.119947  | 0.650200  |
| 5                | 8                | 0              | -2.361713               | 1.614084  | -0.173617 |
| 6                | 1                | 0              | -1.234489               | 1.571244  | 0.200769  |
| 7                | 1                | 0              | -2.481721               | 2.087489  | -1.010588 |
| 8                | 1                | 0              | -2.568751               | 0.654111  | -0.316598 |
| 9                | 1                | 0              | 1.243685                | -0.607502 | 1.470102  |
| 10               | 17               | 0              | -1.800794               | -1.391593 | -0.059805 |
| 11               | 17               | 0              | 2.739438                | 0.111575  | -0.251079 |

## Standard orientation of TS-NCCMHA/M06-2X

Cartesian coordinates of all the transition states optimized at the m062x/6-311+G\*\* level:

Standard orientation of TS-NCCMHA/M06-2X

State=1-A

Charge = 0 Multiplicity = 1

Lowest Harmonic Vibrational Frequency (LHVF) = -668.56 cm<sup>-1</sup>

Standard orientation:

| Center<br>Number | Atomic<br>Number | Atomic<br>Type | Coordinates (Angstroms) |           |           |
|------------------|------------------|----------------|-------------------------|-----------|-----------|
|                  |                  |                | X                       | Y         | Z         |
| 1                | 6                | 0              | 1.174918                | -0.674067 | 0.253994  |
| 2                | 7                | 0              | 0.095655                | 0.218782  | -0.212531 |
| 3                | 1                | 0              | 1.113733                | -1.600915 | -0.302445 |
| 4                | 8                | 0              | -0.180243               | 1.059068  | 0.650056  |
| 5                | 8                | 0              | -2.331455               | 1.652899  | -0.153942 |
| 6                | 1                | 0              | -1.206394               | 1.552018  | 0.244328  |
| 7                | 1                | 0              | -2.437833               | 2.181095  | -0.957150 |
| 8                | 1                | 0              | -2.606655               | 0.729956  | -0.341565 |
| 9                | 1                | 0              | 1.141005                | -0.803622 | 1.332643  |
| 10               | 17               | 0              | -1.723356               | -1.411534 | -0.040011 |
| 11               | 17               | 0              | 2.686335                | 0.162043  | -0.194164 |

## Standard orientation of TS-CNSM/B3LYP

Cartesian coordinates of all the transition states optimized at the b3lyp/6-311+G\*\* level:

Standard orientation of TS-CNSM/B3LYP

State=1-A

Charge = 0 Multiplicity = 1

Lowest Harmonic Vibrational Frequency (LHVF) = -399.60 cm<sup>-1</sup>

Standard orientation:

| Center<br>Number | Atomic<br>Number | Atomic<br>Type | Coordinates (Angstroms) |           |           |
|------------------|------------------|----------------|-------------------------|-----------|-----------|
|                  |                  |                | X                       | Y         | Z         |
| 1                | 6                | 0              | 1.243730                | -0.607777 | 0.395134  |
| 2                | 7                | 0              | 0.457280                | 0.645505  | 0.260765  |
| 3                | 8                | 0              | -1.289709               | 0.200497  | 0.239424  |
| 4                | 8                | 0              | 0.897156                | 1.632248  | -0.185360 |
| 5                | 1                | 0              | -1.613281               | 1.082162  | 0.497176  |
| 6                | 17               | 0              | -3.358971               | -0.360216 | -0.167044 |
| 7                | 17               | 0              | 2.898683                | -0.487916 | -0.211604 |
| 8                | 1                | 0              | 1.238202                | -0.836137 | 1.461984  |
| 9                | 1                | 0              | 0.677064                | -1.361618 | -0.150814 |

## Standard orientation of TS-CNSM/M06-2X

Cartesian coordinates of all the transition states optimized at the m062x/6-311+G\*\* level:

Standard orientation of TS-CNSM/M06-2X

State=1-A

Charge = 0 Multiplicity = 1

Lowest Harmonic Vibrational Frequency (LHVF) = -609.33 cm<sup>-1</sup>

Standard orientation:

| Center<br>Number | Atomic<br>Number | Atomic<br>Type | Coordinates (Angstroms) |           |           |
|------------------|------------------|----------------|-------------------------|-----------|-----------|
|                  |                  |                | X                       | Y         | Z         |
| 1                | 6                | 0              | 1.225729                | -0.666281 | 0.261993  |
| 2                | 7                | 0              | 0.432840                | 0.583343  | 0.195292  |
| 3                | 8                | 0              | -1.287143               | 0.172341  | 0.143754  |
| 4                | 8                | 0              | 0.886542                | 1.602883  | -0.118622 |
| 5                | 1                | 0              | -1.586401               | 1.003832  | 0.552609  |
| 6                | 17               | 0              | -3.349262               | -0.327699 | -0.120232 |
| 7                | 17               | 0              | 2.911809                | -0.432346 | -0.146891 |
| 8                | 1                | 0              | 1.109621                | -1.025868 | 1.284535  |
| 9                | 1                | 0              | 0.734032                | -1.344687 | -0.436097 |

## Standard orientation of TS-NM/B3LYP

Cartesian coordinates of all the transition states optimized at the b3lyp/6-311+G\*\* level:

Standard orientation of TS-NM/B3LYP

State=1-A

Charge = 0 Multiplicity = 1

Lowest Harmonic Vibrational Frequency (LHVF) = -270.46 cm<sup>-1</sup>

Standard orientation:

| Center<br>Number | Atomic<br>Number | Atomic<br>Type | Coordinates (Angstroms) |           |           |
|------------------|------------------|----------------|-------------------------|-----------|-----------|
|                  |                  |                | X                       | Y         | Z         |
| 1                | 6                | 0              | -1.462044               | -0.193801 | 1.011002  |
| 2                | 1                | 0              | 1.222323                | 1.730673  | -0.025479 |
| 3                | 8                | 0              | 2.644859                | 1.541892  | -0.314475 |
| 4                | 17               | 0              | 0.995188                | -1.074558 | 0.261017  |
| 5                | 1                | 0              | 2.982719                | 2.015445  | -1.084825 |
| 6                | 7                | 0              | -2.331273               | -0.154536 | -0.090718 |
| 7                | 8                | 0              | 0.201877                | 1.882139  | 0.173253  |
| 8                | 1                | 0              | -0.302397               | 1.012966  | 0.495522  |
| 9                | 1                | 0              | 0.079098                | 2.594587  | 0.818978  |
| 10               | 8                | 0              | 2.684984                | -1.302479 | -0.326056 |
| 11               | 1                | 0              | 3.123068                | -1.777223 | 0.397852  |
| 12               | 1                | 0              | 2.909940                | 0.605146  | -0.411837 |
| 13               | 8                | 0              | -2.451063               | -1.161032 | -0.821716 |
| 14               | 8                | 0              | -2.926523               | 0.914313  | -0.361211 |
| 15               | 1                | 0              | -1.334340               | -1.204350 | 1.377153  |
| 16               | 1                | 0              | -1.740489               | 0.536139  | 1.766007  |



## Standard orientation of TS-NM-1/B3LYP

Cartesian coordinates of all the transition states optimized at the b3lyp/6-311+G\*\* level:

Standard orientation of TS-NM-1/B3LYP

State=1-A

Charge = -1 Multiplicity = 1

Lowest Harmonic Vibrational Frequency (LHVF) = -1123.56 cm<sup>-1</sup>

Standard orientation:

| Center<br>Number | Atomic<br>Number | Atomic<br>Type | Coordinates (Angstroms) |           |           |
|------------------|------------------|----------------|-------------------------|-----------|-----------|
|                  |                  |                | X                       | Y         | Z         |
| 1                | 6                | 0              | 0.308858                | 0.005733  | -0.378486 |
| 2                | 1                | 0              | -0.181059               | -0.129259 | -1.337494 |
| 3                | 1                | 0              | 1.657492                | -0.133912 | -0.626860 |
| 4                | 1                | 0              | 0.077743                | -0.726069 | 0.389228  |
| 5                | 8                | 0              | 2.833216                | -0.251594 | -0.943039 |
| 6                | 8                | 0              | -4.603172               | -0.792996 | 0.136579  |
| 7                | 1                | 0              | -4.731454               | -1.750862 | 0.222906  |
| 8                | 17               | 0              | -2.886866               | -0.632352 | -0.087075 |
| 9                | 17               | 0              | 3.667294                | -1.049125 | 0.346301  |
| 10               | 7                | 0              | 0.123025                | 1.322936  | 0.104278  |
| 11               | 8                | 0              | 0.241652                | 1.548761  | 1.326362  |
| 12               | 8                | 0              | -0.072237               | 2.249610  | -0.709108 |

## Standard orientation of TS-NM-1/M06-2X

Cartesian coordinates of all the transition states optimized at the m062x/6-311+G\*\* level:

Standard orientation of TS-NM-1/M06-2X

State=1-A

Charge = -1 Multiplicity = 1

Lowest Harmonic Vibrational Frequency (LHVF) = -1162.22 cm<sup>-1</sup>

Standard orientation:

| Center<br>Number | Atomic<br>Number | Atomic<br>Type | Coordinates (Angstroms) |           |           |
|------------------|------------------|----------------|-------------------------|-----------|-----------|
|                  |                  |                | X                       | Y         | Z         |
| 1                | 6                | 0              | 0.316352                | -0.189591 | -0.555308 |
| 2                | 1                | 0              | -0.196107               | -0.213262 | -1.511813 |
| 3                | 1                | 0              | 1.632957                | -0.136268 | -0.781220 |
| 4                | 1                | 0              | 0.119636                | -1.028009 | 0.106341  |
| 5                | 8                | 0              | 2.878305                | -0.066162 | -0.980323 |
| 6                | 8                | 0              | -4.411835               | -0.638940 | 0.247299  |
| 7                | 1                | 0              | -4.816990               | -0.126435 | -0.466476 |
| 8                | 17               | 0              | -2.749129               | -0.626610 | -0.109289 |
| 9                | 17               | 0              | 3.595513                | -0.777275 | 0.382464  |
| 10               | 7                | 0              | 0.025173                | 1.033990  | 0.118694  |
| 11               | 8                | 0              | 0.136296                | 1.083063  | 1.342659  |
| 12               | 8                | 0              | -0.253058               | 2.030743  | -0.545861 |

## Standard orientation of TS-NM-2/B3LYP

Cartesian coordinates of all the transition states optimized at the b3lyp/6-311+G\*\* level:

Standard orientation of TS-NM-2/B3LYP

State=1-A

Charge = -1 Multiplicity = 1

Lowest Harmonic Vibrational Frequency (LHVF) = -272.05 cm<sup>-1</sup>

Standard orientation:

| Center<br>Number | Atomic<br>Number | Atomic<br>Type | Coordinates (Angstroms) |           |           |
|------------------|------------------|----------------|-------------------------|-----------|-----------|
|                  |                  |                | X                       | Y         | Z         |
| 1                | 6                | 0              | -1.253751               | 0.567208  | 0.029441  |
| 2                | 1                | 0              | -0.689566               | 0.856216  | -0.853764 |
| 3                | 1                | 0              | -2.349061               | 1.080452  | -0.015805 |
| 4                | 1                | 0              | -0.768418               | 0.835980  | 0.964298  |
| 5                | 8                | 0              | -3.676604               | 1.749414  | -0.140499 |
| 6                | 1                | 0              | -4.042300               | 1.808735  | 0.750128  |
| 7                | 8                | 0              | 4.202863                | 0.086409  | -0.092876 |
| 8                | 1                | 0              | 4.577600                | 0.800489  | 0.446994  |
| 9                | 17               | 0              | 2.494318                | 0.338209  | 0.028463  |
| 10               | 7                | 0              | -1.465022               | -0.864341 | 0.004528  |
| 11               | 8                | 0              | -1.657462               | -1.456727 | 1.075678  |
| 12               | 8                | 0              | -1.538047               | -1.439632 | -1.090312 |

## Standard orientation of TS-NM-2/M06-2X

Cartesian coordinates of all the transition states optimized at the m062x/6-311+G\*\* level:

Standard orientation of TS-NM-2/M06-2X

State=1-A

Charge = -1 Multiplicity = 1

Lowest Harmonic Vibrational Frequency (LHVF) = -174.38 cm<sup>-1</sup>

Standard orientation:

| Center<br>Number | Atomic<br>Number | Atomic<br>Type | Coordinates (Angstroms) |           |           |
|------------------|------------------|----------------|-------------------------|-----------|-----------|
|                  |                  |                | X                       | Y         | Z         |
| 1                | 6                | 0              | 1.242907                | -0.782287 | 0.002903  |
| 2                | 1                | 0              | 0.817376                | -1.220606 | -0.895832 |
| 3                | 1                | 0              | 2.430898                | -0.819016 | -0.020510 |
| 4                | 1                | 0              | 0.854935                | -1.213469 | 0.922362  |
| 5                | 8                | 0              | 3.955014                | -0.778717 | -0.134351 |
| 6                | 1                | 0              | 4.357893                | -0.560420 | 0.710813  |
| 7                | 8                | 0              | -3.525204               | 0.205045  | -0.178255 |
| 8                | 1                | 0              | -3.848795               | 0.385776  | 0.715648  |
| 9                | 17               | 0              | -2.087024               | -0.665045 | 0.055015  |
| 10               | 7                | 0              | 0.928764                | 0.641591  | 0.004716  |
| 11               | 8                | 0              | 0.882947                | 1.226191  | 1.076227  |
| 12               | 8                | 0              | 0.800781                | 1.214491  | -1.065893 |

## Standard orientation of TS-CNM<sup>-</sup>/B3LYP

Cartesian coordinates of all the transition states optimized at the b3lyp/6-311+G\*\* level:

Standard orientation of TS-CNM<sup>-</sup>/B3LYP

State=1-A

Charge = -1 Multiplicity = 1

Lowest Harmonic Vibrational Frequency (LHVF) = -105.46 cm<sup>-1</sup>

Standard orientation:

| Center<br>Number | Atomic<br>Number | Atomic<br>Type | Coordinates (Angstroms) |           |           |
|------------------|------------------|----------------|-------------------------|-----------|-----------|
|                  |                  |                | X                       | Y         | Z         |
| 1                | 6                | 0              | 0.017649                | 0.190600  | -0.205573 |
| 2                | 8                | 0              | -4.696772               | -0.167844 | -0.456410 |
| 3                | 1                | 0              | -4.995286               | 0.662549  | -0.053853 |
| 4                | 17               | 0              | -2.948973               | -0.028876 | -0.415108 |
| 5                | 1                | 0              | 1.901507                | 0.004819  | -0.910690 |
| 6                | 8                | 0              | 2.764097                | -0.071859 | -1.389108 |
| 7                | 17               | 0              | 3.953258                | -0.054229 | -0.133248 |
| 8                | 17               | 0              | 0.033715                | 1.794287  | 0.486773  |
| 9                | 7                | 0              | 0.031390                | -0.899764 | 0.594747  |
| 10               | 8                | 0              | -0.063967               | -2.044277 | 0.037825  |
| 11               | 8                | 0              | 0.170707                | -0.801741 | 1.847648  |
| 12               | 1                | 0              | -0.270364               | 0.083038  | -1.237990 |

## Standard orientation of TS-CNM<sup>-</sup>/M06-2X

Cartesian coordinates of all the transition states optimized at the m062x/6-311+G\*\* level:

Standard orientation of TS-CNM<sup>-</sup>/M06-2X

State=1-A

Charge = -1 Multiplicity = 1

Lowest Harmonic Vibrational Frequency (LHVF) = -223.02 cm<sup>-1</sup>

Standard orientation:

| Center<br>Number | Atomic<br>Number | Atomic<br>Type | Coordinates (Angstroms) |           |           |
|------------------|------------------|----------------|-------------------------|-----------|-----------|
|                  |                  |                | X                       | Y         | Z         |
| 1                | 6                | 0              | -0.426858               | 0.170671  | -0.710615 |
| 2                | 8                | 0              | -4.396111               | 0.024331  | 0.436830  |
| 3                | 1                | 0              | -4.700431               | -0.844267 | 0.147430  |
| 4                | 17               | 0              | -2.639545               | 0.051399  | -0.087140 |
| 5                | 1                | 0              | 2.068461                | 0.022024  | 1.293194  |
| 6                | 8                | 0              | 2.996427                | 0.306831  | 1.139266  |
| 7                | 17               | 0              | 3.270398                | -0.199014 | -0.455117 |
| 8                | 17               | 0              | 0.163174                | 1.716709  | -0.180841 |
| 9                | 7                | 0              | 0.040303                | -0.935941 | -0.034928 |
| 10               | 8                | 0              | -0.140701               | -2.047167 | -0.549470 |
| 11               | 8                | 0              | 0.526000                | -0.829332 | 1.115958  |
| 12               | 1                | 0              | -0.472376               | 0.037907  | -1.780436 |

## Standard orientation of TS-DCNM<sup>-</sup>/B3LYP

Cartesian coordinates of all the transition states optimized at the b3lyp/6-311+G\*\* level:

Standard orientation of TS-DCNM<sup>-</sup>/B3LYP

State=1-A

Charge = -1 Multiplicity = 1

Lowest Harmonic Vibrational Frequency (LHVF) = -197.75 cm<sup>-1</sup>

Standard orientation:

| Center<br>Number | Atomic<br>Number | Atomic<br>Type | Coordinates (Angstroms) |           |           |
|------------------|------------------|----------------|-------------------------|-----------|-----------|
|                  |                  |                | X                       | Y         | Z         |
| 1                | 6                | 0              | -0.040918               | 0.354944  | 0.104277  |
| 2                | 8                | 0              | -4.848753               | -0.471443 | -0.049751 |
| 3                | 1                | 0              | -4.952602               | -1.374542 | 0.289302  |
| 4                | 17               | 0              | -3.130340               | -0.207384 | 0.018075  |
| 5                | 17               | 0              | -0.212919               | 1.898243  | -0.676465 |
| 6                | 1                | 0              | 2.322589                | 0.458018  | -0.134494 |
| 7                | 8                | 0              | 3.235332                | 0.719024  | -0.353573 |
| 8                | 17               | 0              | 4.182997                | -0.654813 | 0.099723  |
| 9                | 17               | 0              | 0.011973                | 0.339908  | 1.840822  |
| 10               | 7                | 0              | 0.029871                | -0.784450 | -0.608513 |
| 11               | 8                | 0              | -0.011273               | -0.734492 | -1.883774 |
| 12               | 8                | 0              | 0.148111                | -1.902238 | -0.002588 |

## Standard orientation of TS-DCNM<sup>-</sup>/M06-2X

Cartesian coordinates of all the transition states optimized at the m062x/6-311+G\*\* level:

Standard orientation of TS-DCNM<sup>-</sup>/M06-2X

State=1-A

Charge = -1 Multiplicity = 1

Lowest Harmonic Vibrational Frequency (LHVF) = -145.25 cm<sup>-1</sup>

Standard orientation:

| Center<br>Number | Atomic<br>Number | Atomic<br>Type | Coordinates (Angstroms) |           |           |
|------------------|------------------|----------------|-------------------------|-----------|-----------|
|                  |                  |                | X                       | Y         | Z         |
| 1                | 6                | 0              | -0.415169               | 0.380090  | 0.178236  |
| 2                | 8                | 0              | -4.325831               | -0.837011 | -0.029237 |
| 3                | 1                | 0              | -4.292700               | -1.686490 | -0.484854 |
| 4                | 17               | 0              | -2.561609               | -0.320815 | 0.035678  |
| 5                | 1                | 0              | 2.171444                | -1.626396 | 0.055503  |
| 6                | 8                | 0              | 3.089905                | -1.411389 | 0.317007  |
| 7                | 17               | 0              | 3.263315                | 0.195879  | -0.192903 |
| 8                | 17               | 0              | 0.224863                | -0.174416 | 1.704903  |
| 9                | 7                | 0              | 0.129032                | -0.293076 | -0.951822 |
| 10               | 8                | 0              | 0.021116                | 0.221449  | -2.055058 |
| 11               | 8                | 0              | 0.555749                | -1.450417 | -0.800590 |
| 12               | 17               | 0              | -0.398244               | 2.117165  | 0.015012  |
